# Supplementary material for: Novel Implementation of Genotype‐Guided Proton Pump Inhibitor Medication Therapy in Children: A Pilot, Randomized, Multisite Pragmatic Trial
Source: PubMed Central journal article supplement — Clin Transl Sci. 2018 Oct 20;12(2):172–9. doi: 10.1111/cts.12589 (PMC6440564; doi:10.1111/cts.12589), 2018-10-20
Supplement: CTS-12-172-s001.pdf [file CTS-12-172-s001.pdf]

Table S1: Sensitivity Analysis of SN-5 (Participants prescribed omeprazole only)

| SN-5 Components, median (IQR) | Conventional Dosing<br>n=16 | Genotype Guided Dosing<br>n=14 | p-value (unadjusted) | p-value <sup>a</sup> |
|-------------------------------|-----------------------------|--------------------------------|----------------------|----------------------|
| Sinus Infection               | 2.5 (1.0, 3.0)              | 1.0 (1.0, 3.0)                 | 0.29                 | 0.48                 |
| Nasal Obstruction             | 3.0 (1.0, 4.0)              | 1.0 (1.0, 2.0)                 | 0.09                 | 0.02                 |
| Allergy Symptoms              | 3.0 (2.0, 4.0)              | 1.0 (1.0, 2.0)                 | <b>0.002</b>         | <b>0.0004</b>        |
| Emotional Distress            | 3.5 (1.0, 5.0)              | 1.5 (1.0, 3.0)                 | 0.14                 | 0.63                 |
| Activity Limitations          | 1.0 (1.0, 3.0)              | 1.0 (1.0, 1.0)                 | 0.04                 | 0.06                 |
| SN-5 Score                    | 2.7 (2.3, 3.5)              | 1.8 (1.0, 2.2)                 | <b>0.003</b>         | <b>0.002</b>         |

<sup>a</sup>adjusted for baseline score, race, baseline PPI use, baseline H2RA use  
IQR, inter quartile range
