# Supplementary material for: Novel Implementation of Genotype‐Guided Proton Pump Inhibitor Medication Therapy in Children: A Pilot, Randomized, Multisite Pragmatic Trial
Source: PubMed Central journal article supplement — Clin Transl Sci. 2018 Oct 20;12(2):172–9. doi: 10.1111/cts.12589 (PMC6440564; doi:10.1111/cts.12589), 2018-10-20
Supplement: CTS-12-172-s002.pdf [file CTS-12-172-s002.pdf]

Table S2: Change in GASP-Q Scores

|                            | <b>Conventional Treatment<br/>n=22</b> | <b>Genotype-Supported<br/>n=18</b> | <b>p-value</b> |
|----------------------------|----------------------------------------|------------------------------------|----------------|
| <b>GASPQ, median (IQR)</b> |                                        |                                    |                |
| Belly pain                 | -8.0 (-14.0, 6.0)                      | -9.5 (-16.0, 0)                    | 0.65           |
| Chest pain                 | 0 (-12.0, 6.0)                         | -0.5 (-13.0, 4.0)                  | 0.72           |
| Difficulty swallowing      | 0 (0, 0)                               | 0 (0, 0)                           | 0.56           |
| Choking                    | 0 (0, 0)                               | 0 (0, 0)                           | 0.05           |
| Burping                    | 0 (-7.0, 1.0)                          | -2.0 (-9.0, 0)                     | 0.26           |
| Nausea                     | -1.0 (-12.0, 0)                        | -9.0 (-16.0, 0)                    | 0.09           |
| Pain after eating          | -1.5 (-11.0, 1.0)                      | -4.0 (-12.0, 0)                    | 0.66           |
| Night pain                 | 0 (-6.0, 1.0)                          | 0 (-4.0, 0)                        | 0.78           |
| Vomiting                   | 0 (0, 3.0)                             | 0 (-10.0, 0)                       | 0.07           |
| Composite Score            | -26.0 (-35.0, 10.0)                    | -24.0 (-32.0, -9.0)                | 0.97           |

Median of 39 days between follow up and baseline
