# Supplementary material for: Novel Implementation of Genotype‐Guided Proton Pump Inhibitor Medication Therapy in Children: A Pilot, Randomized, Multisite Pragmatic Trial
Source: PubMed Central journal article supplement — Clin Transl Sci. 2018 Oct 20;12(2):172–9. doi: 10.1111/cts.12589 (PMC6440564; doi:10.1111/cts.12589), 2018-10-20
Supplement: CTS-12-172-s003.pdf [file CTS-12-172-s003.pdf]

Table S3: Change in PedsQL Scores

|                         | <b>Conventional Treatment<br/>n=22</b> | <b>Genotype-Supported<br/>n=19</b> | <b>p-value</b> |
|-------------------------|----------------------------------------|------------------------------------|----------------|
| PedsQL, median (IQR)    |                                        |                                    |                |
| Stomach Pain & Hurt     | 10.4 (0, 41.7)                         | 20.9 (-4.1, 45.8)                  | 0.41           |
| Stomach Discomfort      | 7.5 (-10.0, 20.0)                      | 0 (-20.0, 35.0)                    | 0.64           |
| Food & Drink Limits     | 0 (-12.5, 12.5)                        | 4.2 (-12.5, 25)                    | 1.00           |
| Trouble Swallowing      | 0 (0, 8.3)                             | 0 (0, 16.7)                        | 0.79           |
| Heartburn & Reflux      | 12.5 (0, 25.0)                         | 0 (-6.3, 18.7)                     | 0.20           |
| Nausea & Vomiting       | 9.4 (0, 18.7)                          | 6.2 (0, 12.5)                      | 0.43           |
| Gas & Bloating          | 5.4 (-7.2, 17.9)                       | 7.2 (-7.1, 46.5)                   | 0.37           |
| Constipation            | 7.1 (-5.4, 16.1)                       | 7.1 (-3.5, 19.6)                   | 0.71           |
| Blood in Bowel Movement | 0 (0, 0)                               | 0 (0, 0)                           | 0.21           |
| Diarrhea                | 0 (0, 7.1)                             | 0 (0, 7.1)                         | 0.88           |
| Composite Score         | 5.4 (-1.7, 13.4)                       | 8.2 (-3.0, 21.1)                   | 0.83           |

Median of 39 days between follow up and baseline
